# Supplementary material
Source: publisher site journal article supplement (https://www.spandidos-publications.com/4259/downloadSupplementary)
Supplement: Supplementary file 1 [file downloadSupplementary]

## Sheet: Table SI
TABLE SI. The differentially expressed genes that are common in more than 10 datasets of gene expression in ESCC.
Gene Symbol	Mean log2(Fold Change)	Num of Supporting Dataset	Mean Fold Change	Note
MMP1	6.26	16	76.6	up
CST1	5.65	11	50.2	up
MMP13	4.92	15	30.3	up
MMP10	4.85	16	28.8	up
SPP1	4.67	17	25.5	up
MMP11	4.44	16	21.7	up
MMP12	4.41	16	21.3	up
COL11A1	4.4	16	21.1	up
COL10A1	4.31	16	19.8	up
CTHRC1	3.95	14	15.5	up
HMGA2	3.85	12	14.4	up
WNT2	3.72	10	13.2	up
COL1A1	3.71	16	13.1	up
MMP3	3.69	16	12.9	up
CXCL8	3.66	16	12.6	up
SIX1	3.6	10	12.1	up
POSTN	3.6	15	12.1	up
INHBA	3.57	16	11.9	up
SIX4	3.55	13	11.7	up
ANO1	3.52	15	11.5	up
EN1	3.5	10	11.3	up
LAMC2	3.48	17	11.2	up
WDR72	3.47	14	11.1	up
WDR66	3.46	15	11	up
HOXD11	3.45	13	10.9	up
PTHLH	3.37	15	10.3	up
SHISA2	3.32	12	9.99	up
ZIC2	3.29	11	9.78	up
FCGR3A	3.26	10	9.58	up
MFAP2	3.16	16	8.94	up
APOC1	3.15	11	8.88	up
UCHL1	3.14	12	8.82	up
SFRP4	3.12	13	8.69	up
NELL2	3.05	16	8.28	up
ZNF469	3.02	10	8.11	up
SERPINE1	2.96	15	7.78	up
ADAMTS2	2.95	11	7.73	up
HOXD10	2.95	12	7.73	up
ADAM12	2.93	13	7.62	up
ABCA13	2.91	11	7.52	up
HOXC10	2.9	11	7.46	up
EPCAM	2.87	14	7.31	up
MMP9	2.86	13	7.26	up
KIF26B	2.86	13	7.26	up
HEY1	2.85	14	7.21	up
TGFBI	2.84	16	7.16	up
IGF2BP2	2.84	17	7.16	up
TNC	2.84	13	7.16	up
GPRIN1	2.82	10	7.06	up
ADAMTS12	2.8	14	6.96	up
SDK1	2.75	10	6.73	up
VCAN	2.74	16	6.68	up
LOXL2	2.73	15	6.63	up
ODC1	2.73	15	6.63	up
BCAT1	2.71	12	6.54	up
ARTN	2.69	10	6.45	up
PLAU	2.67	17	6.36	up
TENM2	2.67	11	6.36	up
PLA2G7	2.65	15	6.28	up
COL5A2	2.64	16	6.23	up
RAB3B	2.64	10	6.23	up
PHLDB2	2.62	10	6.15	up
SEMA3C	2.61	13	6.11	up
CXCL1	2.6	16	6.06	up
IGFBP3	2.56	16	5.9	up
STC2	2.56	14	5.9	up
PCSK9	2.55	10	5.86	up
NRCAM	2.55	14	5.86	up
IFI6	2.54	14	5.82	up
CDH11	2.53	15	5.78	up
HOXB7	2.53	18	5.78	up
FN1	2.52	14	5.74	up
COL5A1	2.5	15	5.66	up
POPDC3	2.47	10	5.54	up
LARP6	2.47	13	5.54	up
SLC7A11	2.46	13	5.5	up
APOBEC3B	2.45	14	5.46	up
HOXA10	2.45	11	5.46	up
COL1A2	2.45	15	5.46	up
COL3A1	2.44	16	5.43	up
COL4A2	2.4	13	5.28	up
CXCL10	2.38	10	5.21	up
SNX10	2.38	17	5.21	up
EPPK1	2.38	10	5.21	up
COL12A1	2.37	11	5.17	up
LAMB3	2.33	17	5.03	up
STC1	2.33	10	5.03	up
CHST2	2.29	14	4.89	up
ISG15	2.29	14	4.89	up
PXDN	2.29	16	4.89	up
PMEPA1	2.29	14	4.89	up
ACVR1C	2.28	10	4.86	up
PDPN	2.28	11	4.86	up
TTYH3	2.27	10	4.82	up
PFN2	2.27	15	4.82	up
WDR54	2.27	11	4.82	up
IFI44L	2.26	13	4.79	up
IGF2BP3	2.25	11	4.76	up
SULF1	2.25	16	4.76	up
LGALS1	2.24	14	4.72	up
FSCN1	2.23	17	4.69	up
LAMP3	2.22	15	4.66	up
DDX60	2.22	11	4.66	up
CNTNAP2	2.22	10	4.66	up
COL4A5	2.21	10	4.63	up
BGN	2.19	16	4.56	up
NOX4	2.19	13	4.56	up
FCGR2A	2.19	10	4.56	up
SLC39A14	2.18	13	4.53	up
SERPINH1	2.16	16	4.47	up
CD276	2.16	10	4.47	up
RUNX2	2.16	11	4.47	up
TNFAIP6	2.15	12	4.44	up
CEP55	2.15	17	4.44	up
GLI2	2.14	12	4.41	up
RSAD2	2.14	11	4.41	up
THY1	2.13	11	4.38	up
TNFRSF12A	2.13	11	4.38	up
MET	2.12	14	4.35	up
CDH3	2.11	16	4.32	up
ECT2	2.11	17	4.32	up
E2F7	2.11	10	4.32	up
TOP2A	2.1	16	4.29	up
KRT8	2.1	11	4.29	up
PPFIA1	2.09	15	4.26	up
OLFML2B	2.09	12	4.26	up
LRP12	2.09	15	4.26	up
MEST	2.08	17	4.23	up
LAMA3	2.08	15	4.23	up
FNDC3B	2.07	14	4.2	up
MFHAS1	2.06	15	4.17	up
MCM2	2.06	17	4.17	up
RCN3	2.05	10	4.14	up
LPCAT1	2.05	16	4.14	up
MYBL2	2.05	16	4.14	up
CHST1	2.05	11	4.14	up
PLAUR	2.05	15	4.14	up
KIF14	2.05	18	4.14	up
KIF2C	2.04	16	4.11	up
HAS2	2.04	10	4.11	up
COL4A1	2.03	15	4.08	up
BCL2A1	2.03	10	4.08	up
MARCKSL1	2.03	16	4.08	up
TXNRD1	2.03	11	4.08	up
CDCA5	2.03	13	4.08	up
TPX2	2.03	17	4.08	up
ENO2	2.01	13	4.03	up
KRT14	2.01	11	4.03	up
FADD	2.01	13	4.03	up
UBE2C	2.01	17	4.03	up
ALCAM	2	14	4	up
CXCL6	2	11	4	up
RAB15	2	10	4	up
IFIT3	1.99	10	3.97	up
DNMT3B	1.98	17	3.94	up
FAP	1.98	11	3.94	up
AURKA	1.97	16	3.92	up
BAMBI	1.96	12	3.89	up
AIM2	1.96	10	3.89	up
PLK1	1.96	10	3.89	up
KIF4A	1.96	18	3.89	up
CYP27B1	1.96	10	3.89	up
FST	1.94	15	3.84	up
TP63	1.94	13	3.84	up
RBP1	1.94	15	3.84	up
ASPN	1.94	15	3.84	up
FOXE1	1.93	16	3.81	up
XCL1	1.93	12	3.81	up
MLF1	1.92	15	3.78	up
RPL39L	1.92	16	3.78	up
KCNS3	1.91	16	3.76	up
AMIGO2	1.91	11	3.76	up
NEK2	1.91	16	3.76	up
BUB1	1.9	15	3.73	up
KIF20A	1.9	15	3.73	up
CDC6	1.89	16	3.71	up
MXRA5	1.89	10	3.71	up
RFC4	1.89	18	3.71	up
CDC45	1.89	15	3.71	up
FOXM1	1.89	19	3.71	up
IFIT1	1.89	11	3.71	up
FMNL2	1.89	12	3.71	up
SPARC	1.88	15	3.68	up
HERC5	1.88	10	3.68	up
TFRC	1.88	15	3.68	up
DSG2	1.87	12	3.66	up
ITGA6	1.87	17	3.66	up
CCL20	1.87	11	3.66	up
EPB41L4B	1.87	15	3.66	up
DTL	1.87	19	3.66	up
SNAI2	1.87	13	3.66	up
MMP2	1.87	11	3.66	up
DLGAP5	1.87	14	3.66	up
COL27A1	1.86	11	3.63	up
GALNT6	1.86	12	3.63	up
GALNT18	1.86	11	3.63	up
CDK1	1.86	12	3.63	up
COL7A1	1.85	16	3.61	up
TRIP13	1.85	18	3.61	up
CDC20	1.84	16	3.58	up
ISLR	1.84	11	3.58	up
BIRC5	1.84	14	3.58	up
CDKN3	1.84	18	3.58	up
APOL1	1.83	10	3.56	up
RAD51AP1	1.83	17	3.56	up
GNA12	1.83	10	3.56	up
HJURP	1.83	14	3.56	up
NEB	1.83	10	3.56	up
LUM	1.83	15	3.56	up
DEPDC1B	1.82	12	3.53	up
SLC16A1	1.82	12	3.53	up
NDC80	1.82	14	3.53	up
CENPF	1.82	18	3.53	up
NUF2	1.82	13	3.53	up
GPNMB	1.81	14	3.51	up
PRSS23	1.8	12	3.48	up
PLXNA1	1.8	17	3.48	up
MTFR2	1.8	10	3.48	up
NUAK1	1.8	13	3.48	up
COL6A3	1.79	16	3.46	up
MCM10	1.79	15	3.46	up
MLLT11	1.78	10	3.43	up
CENPA	1.78	12	3.43	up
KIF18A	1.78	14	3.43	up
PLOD3	1.78	13	3.43	up
THBS2	1.78	15	3.43	up
FOXD1	1.77	10	3.41	up
DHCR7	1.77	13	3.41	up
CTSL	1.77	10	3.41	up
ETV5	1.77	11	3.41	up
CHST11	1.77	10	3.41	up
TROAP	1.76	12	3.39	up
LAPTM4B	1.76	16	3.39	up
EXO1	1.76	15	3.39	up
MKI67	1.76	10	3.39	up
SOX4	1.76	17	3.39	up
HOMER3	1.75	17	3.36	up
UBE2T	1.75	15	3.36	up
HMGB3	1.75	16	3.36	up
UHRF1	1.75	14	3.36	up
SPOCK1	1.74	12	3.34	up
CDC25B	1.74	16	3.34	up
ITGB4	1.74	17	3.34	up
AURKB	1.74	17	3.34	up
FAT1	1.73	10	3.32	up
WDHD1	1.73	16	3.32	up
TMEM45A	1.73	11	3.32	up
GREM1	1.72	11	3.29	up
ABCC5	1.72	10	3.29	up
LMNB1	1.72	10	3.29	up
AKR1B1	1.72	11	3.29	up
BID	1.72	15	3.29	up
ASPM	1.72	16	3.29	up
DDX11	1.71	10	3.27	up
FBN2	1.71	11	3.27	up
CHST7	1.71	10	3.27	up
KIF23	1.71	15	3.27	up
IQGAP3	1.71	10	3.27	up
OIP5	1.71	10	3.27	up
DEPDC1	1.71	10	3.27	up
AEBP1	1.71	11	3.27	up
TK1	1.7	14	3.25	up
SPAG5	1.7	16	3.25	up
CDCA2	1.7	11	3.25	up
CHST15	1.69	10	3.23	up
CDK14	1.69	12	3.23	up
BUB1B	1.69	13	3.23	up
NETO2	1.69	15	3.23	up
ATAD2	1.68	16	3.2	up
CKS2	1.68	13	3.2	up
TLR2	1.68	12	3.2	up
AUNIP	1.68	11	3.2	up
FZD2	1.68	10	3.2	up
KDELR3	1.68	13	3.2	up
CDT1	1.68	11	3.2	up
ITGA3	1.67	11	3.18	up
KIF18B	1.67	14	3.18	up
BLM	1.67	17	3.18	up
MYH10	1.67	12	3.18	up
PPP1R14C	1.66	11	3.16	up
SLC2A1	1.66	13	3.16	up
HMMR	1.66	13	3.16	up
GOLIM4	1.66	11	3.16	up
SPC25	1.65	13	3.14	up
USP18	1.65	10	3.14	up
C12orf75	1.65	11	3.14	up
TTK	1.65	15	3.14	up
CDCA3	1.65	14	3.14	up
MYO1B	1.65	11	3.14	up
BST2	1.65	10	3.14	up
CMSS1	1.65	11	3.14	up
RAD54L	1.64	12	3.12	up
ACKR3	1.64	15	3.12	up
NCAPH	1.63	12	3.1	up
CHI3L1	1.63	11	3.1	up
NCAPG	1.63	12	3.1	up
GINS2	1.63	16	3.1	up
COCH	1.63	11	3.1	up
PLOD1	1.63	12	3.1	up
MTBP	1.62	10	3.07	up
STIL	1.62	14	3.07	up
PRC1	1.62	15	3.07	up
CTSC	1.61	14	3.05	up
P4HA1	1.61	11	3.05	up
EFNA1	1.61	10	3.05	up
IFI35	1.61	13	3.05	up
IFI44	1.6	12	3.03	up
PTK7	1.6	13	3.03	up
PTPRZ1	1.6	10	3.03	up
HLTF	1.6	15	3.03	up
GXYLT2	1.6	10	3.03	up
RTP4	1.6	10	3.03	up
CCNB2	1.6	14	3.03	up
PBK	1.6	13	3.03	up
ARPC1B	1.6	16	3.03	up
KNSTRN	1.6	11	3.03	up
ACTL6A	1.59	14	3.01	up
TMEM132A	1.59	12	3.01	up
COLGALT1	1.59	10	3.01	up
CENPN	1.59	15	3.01	up
GINS1	1.59	16	3.01	up
CDK6	1.58	10	2.99	up
CKS1B	1.58	17	2.99	up
MELK	1.58	14	2.99	up
CENPE	1.58	12	2.99	up
GBP1	1.57	10	2.97	up
KPNA2	1.57	10	2.97	up
VOPP1	1.57	13	2.97	up
XPR1	1.57	12	2.97	up
CBX2	1.57	10	2.97	up
MAD2L1	1.56	14	2.95	up
MTHFD2	1.56	14	2.95	up
MCM7	1.56	15	2.95	up
CDCA8	1.55	10	2.93	up
SH3BP4	1.55	13	2.93	up
FANCI	1.55	15	2.93	up
DSCC1	1.55	12	2.93	up
LIMK1	1.55	10	2.93	up
CKAP2L	1.54	12	2.91	up
TRAM2	1.54	15	2.91	up
ERVMER34-1	1.54	10	2.91	up
ENAH	1.54	16	2.91	up
LOX	1.54	13	2.91	up
TACC3	1.54	10	2.91	up
PROCR	1.54	12	2.91	up
RNASEH2A	1.53	13	2.89	up
DACT1	1.53	10	2.89	up
YEATS2	1.53	13	2.89	up
KIF15	1.52	12	2.87	up
RUVBL1	1.52	16	2.87	up
MYO5A	1.52	14	2.87	up
NCF2	1.52	10	2.87	up
TMEM97	1.51	15	2.85	up
ASF1B	1.51	11	2.85	up
CTSK	1.51	12	2.85	up
LMNB2	1.51	10	2.85	up
TIMELESS	1.5	15	2.83	up
CENPI	1.5	16	2.83	up
CCNB1	1.49	13	2.81	up
LRRC8D	1.49	16	2.81	up
HELLS	1.49	10	2.81	up
RRM2	1.49	14	2.81	up
SLC3A2	1.48	12	2.79	up
UBE2S	1.48	10	2.79	up
CHN1	1.48	10	2.79	up
FBXO5	1.47	11	2.77	up
MCM3	1.47	11	2.77	up
ANTXR1	1.47	10	2.77	up
APMAP	1.47	15	2.77	up
AGRN	1.46	15	2.75	up
BORA	1.46	10	2.75	up
PGBD5	1.46	13	2.75	up
ORC6	1.45	16	2.73	up
KNTC1	1.45	12	2.73	up
ADA	1.45	11	2.73	up
NUSAP1	1.45	15	2.73	up
COL6A2	1.44	10	2.71	up
PAQR4	1.44	10	2.71	up
PCOLCE	1.44	10	2.71	up
NAV1	1.44	11	2.71	up
FEN1	1.44	13	2.71	up
WNT7B	1.43	10	2.69	up
TOPBP1	1.43	10	2.69	up
EIF2AK2	1.43	11	2.69	up
CHEK1	1.43	11	2.69	up
ITGAV	1.43	13	2.69	up
HTRA1	1.43	13	2.69	up
RAD51	1.43	13	2.69	up
BRCA1	1.42	11	2.68	up
MMD	1.42	15	2.68	up
MSH6	1.42	11	2.68	up
SOAT1	1.41	12	2.66	up
PTDSS1	1.41	11	2.66	up
TYMS	1.41	12	2.66	up
TIMP1	1.41	15	2.66	up
RAI14	1.41	14	2.66	up
RAB3IP	1.4	10	2.64	up
NCAPD2	1.4	10	2.64	up
SNAPC1	1.39	10	2.62	up
PARP12	1.39	13	2.62	up
MCM6	1.39	14	2.62	up
MCM5	1.39	15	2.62	up
DNMT1	1.39	14	2.62	up
STMN1	1.39	10	2.62	up
TUSC3	1.39	10	2.62	up
C1orf112	1.38	10	2.6	up
IRS1	1.38	13	2.6	up
FZD6	1.38	13	2.6	up
LSG1	1.38	10	2.6	up
GMNN	1.38	14	2.6	up
PPT1	1.38	13	2.6	up
MCM4	1.38	12	2.6	up
GINS4	1.37	10	2.58	up
ATP1B3	1.37	12	2.58	up
DCBLD1	1.36	12	2.57	up
GPX8	1.36	10	2.57	up
LHFPL2	1.36	11	2.57	up
MCM8	1.36	12	2.57	up
GPX7	1.35	10	2.55	up
COL8A1	1.34	11	2.53	up
BASP1	1.34	10	2.53	up
DBF4	1.33	11	2.51	up
GMPS	1.33	12	2.51	up
MRGBP	1.32	14	2.5	up
NUDT11	1.32	12	2.5	up
TWIST1	1.31	10	2.48	up
RTKN	1.31	11	2.48	up
ITPR3	1.3	14	2.46	up
CENPW	1.29	11	2.45	up
TMEM185B	1.29	12	2.45	up
U2SURP	1.29	11	2.45	up
TCF3	1.28	11	2.43	up
PRIM2	1.27	11	2.41	up
ATP6V1C1	1.27	10	2.41	up
MYO10	1.27	13	2.41	up
MTERF3	1.27	11	2.41	up
HSPH1	1.27	11	2.41	up
NUP107	1.26	11	2.39	up
ABL2	1.25	11	2.38	up
MSN	1.25	12	2.38	up
LAMB1	1.25	12	2.38	up
ZNF281	1.25	15	2.38	up
NUDT1	1.25	10	2.38	up
RSRC1	1.25	12	2.38	up
CBX3	1.25	10	2.38	up
MINPP1	1.24	15	2.36	up
SAC3D1	1.23	10	2.35	up
PCNA	1.23	10	2.35	up
CPNE8	1.22	10	2.33	up
NUP155	1.21	10	2.31	up
PTPRK	1.21	11	2.31	up
CDK4	1.2	10	2.3	up
SLC38A6	1.2	15	2.3	up
DPY19L1	1.14	10	2.2	up
CEMIP	1.13	11	2.19	up
LOXL1	1.12	12	2.17	up
SLC39A6	1.11	15	2.16	up
NREP	1.05	13	2.07	up
FTL	1.04	10	2.06	up
ACVR1	1.03	12	2.04	up
STAT1	1.03	10	2.04	up
CRISP3	-7.22	15	0.007	down
CRNN	-6.22	16	0.013	down
TMPRSS11B	-6.02	13	0.015	down
SPINK7	-6.01	12	0.016	down
MAL	-5.85	18	0.017	down
KRT4	-5.6	16	0.021	down
TGM3	-5.52	14	0.022	down
CAPN14	-5.49	11	0.022	down
KRT78	-5.48	12	0.022	down
CLCA4	-5.27	16	0.026	down
PRSS27	-5.23	10	0.027	down
CRCT1	-5.15	15	0.028	down
GYS2	-5.06	14	0.03	down
HCG22	-5.03	11	0.031	down
PADI1	-5	10	0.031	down
SPRR3	-4.95	13	0.032	down
SPINK5	-4.94	17	0.033	down
SCEL	-4.9	15	0.033	down
CNFN	-4.83	10	0.035	down
SLURP1	-4.83	15	0.035	down
FLG	-4.77	16	0.037	down
ENDOU	-4.68	16	0.039	down
KRT13	-4.59	14	0.042	down
CYP4B1	-4.58	15	0.042	down
CEACAM7	-4.46	13	0.045	down
PPP1R3C	-4.46	17	0.045	down
CYSRT1	-4.44	12	0.046	down
A2ML1	-4.37	11	0.048	down
TMPRSS11E	-4.29	15	0.051	down
RHCG	-4.27	13	0.052	down
KLK13	-4.25	15	0.053	down
CLIC3	-4.22	14	0.054	down
UPK1A	-4.18	15	0.055	down
IL36A	-4.15	14	0.056	down
FAM3D	-3.95	14	0.065	down
ANKRD20A5P	-3.95	10	0.065	down
VSIG2	-3.92	12	0.066	down
VSIG10L	-3.9	11	0.067	down
ECM1	-3.88	18	0.068	down
TFAP2B	-3.79	12	0.072	down
CWH43	-3.79	15	0.072	down
ZNF503-AS1	-3.76	10	0.074	down
FMO2	-3.76	17	0.074	down
HOPX	-3.75	16	0.074	down
HPGD	-3.74	17	0.075	down
FAM3B	-3.74	12	0.075	down
EDN3	-3.73	14	0.075	down
C15orf48	-3.67	11	0.079	down
PSCA	-3.67	15	0.079	down
SH3BGRL2	-3.64	14	0.08	down
SERPINB2	-3.64	15	0.08	down
IL1RN	-3.62	14	0.081	down
TGM1	-3.54	14	0.086	down
KLK12	-3.51	13	0.088	down
EMP1	-3.48	16	0.09	down
CSTB	-3.47	13	0.09	down
CXCR2	-3.47	15	0.09	down
SCNN1B	-3.43	17	0.093	down
CEACAM5	-3.41	13	0.094	down
S100A9	-3.4	12	0.095	down
C5orf66-AS1	-3.37	12	0.097	down
SYNPO2L	-3.34	14	0.099	down
ADH1B	-3.3	15	0.102	down
TMPRSS2	-3.29	13	0.102	down
GBP6	-3.27	10	0.104	down
ATG9B	-3.27	11	0.104	down
PRSS3	-3.25	14	0.105	down
IL18	-3.24	16	0.106	down
MUC15	-3.24	11	0.106	down
TRNP1	-3.23	13	0.107	down
CEACAM6	-3.23	13	0.107	down
SCIN	-3.23	12	0.107	down
ALOX12	-3.22	16	0.107	down
CXCL17	-3.2	11	0.109	down
FCER1A	-3.19	12	0.11	down
SPRR2C	-3.18	10	0.11	down
DEGS2	-3.18	10	0.11	down
SERPINB1	-3.16	15	0.112	down
AIF1L	-3.15	13	0.113	down
CEACAM1	-3.14	14	0.113	down
RDH12	-3.14	10	0.113	down
ANXA9	-3.13	16	0.114	down
SMIM5	-3.13	12	0.114	down
GDPD3	-3.09	17	0.117	down
GABRP	-3.08	12	0.118	down
CRABP2	-3.08	13	0.118	down
BNIPL	-3.06	12	0.12	down
WNK4	-3.04	12	0.122	down
EPS8L1	-3.04	17	0.122	down
TTC9	-3.04	16	0.122	down
SERPINB4	-3.04	10	0.122	down
ATP13A4	-3.04	11	0.122	down
SIM2	-3.02	16	0.123	down
ZNF365	-3.01	16	0.124	down
MALL	-3	15	0.125	down
FUT6	-3	14	0.125	down
DUSP5	-2.99	15	0.126	down
AQP3	-2.96	14	0.129	down
SPRR1A	-2.95	10	0.129	down
EREG	-2.95	11	0.129	down
KLHDC8A	-2.95	10	0.129	down
BBOX1	-2.95	15	0.129	down
ANXA1	-2.94	14	0.13	down
BLNK	-2.91	16	0.133	down
PPL	-2.9	17	0.134	down
LNX1	-2.9	13	0.134	down
FUT3	-2.89	15	0.135	down
TMEM45B	-2.88	10	0.136	down
TCP11L2	-2.88	10	0.136	down
ACPP	-2.86	10	0.138	down
C15orf62	-2.86	12	0.138	down
LMO7	-2.86	12	0.138	down
SULT2B1	-2.86	12	0.138	down
RAET1E	-2.85	11	0.139	down
GPX3	-2.85	16	0.139	down
CRTAC1	-2.81	10	0.143	down
CYP2J2	-2.78	14	0.146	down
C9orf152	-2.78	10	0.146	down
CYP3A5	-2.78	17	0.146	down
IL12A	-2.78	10	0.146	down
CYP2C18	-2.77	14	0.147	down
SASH1	-2.77	18	0.147	down
CHAC1	-2.77	10	0.147	down
FLG-AS1	-2.76	12	0.148	down
MXD1	-2.76	14	0.148	down
SAMD5	-2.75	12	0.149	down
KLK11	-2.75	15	0.149	down
S100P	-2.74	14	0.15	down
C6orf132	-2.74	10	0.15	down
PITX1	-2.74	15	0.15	down
CDA	-2.74	13	0.15	down
THSD4	-2.74	14	0.15	down
CYP2E1	-2.73	13	0.151	down
CTTNBP2	-2.72	14	0.152	down
PCP4	-2.72	11	0.152	down
IKZF2	-2.71	12	0.153	down
DIO2	-2.71	12	0.153	down
SLC16A6	-2.71	14	0.153	down
TCN1	-2.69	13	0.155	down
MGLL	-2.68	18	0.156	down
CGNL1	-2.67	14	0.157	down
SERPINB13	-2.66	12	0.158	down
PTK6	-2.66	15	0.158	down
IVL	-2.65	12	0.159	down
ABLIM3	-2.65	18	0.159	down
GGTA1P	-2.64	10	0.16	down
KAT2B	-2.64	18	0.16	down
TJP3	-2.6	13	0.165	down
EHD3	-2.6	17	0.165	down
CDKN2B	-2.6	10	0.165	down
FNDC4	-2.58	12	0.167	down
DHRS9	-2.58	12	0.167	down
S100A14	-2.57	13	0.168	down
GRPEL2	-2.56	11	0.17	down
ABCA8	-2.56	15	0.17	down
GREM2	-2.55	10	0.171	down
SLC27A6	-2.54	12	0.172	down
ZNF185	-2.54	16	0.172	down
SHROOM3	-2.54	13	0.172	down
YOD1	-2.53	15	0.173	down
RNASE7	-2.51	10	0.176	down
ATP1A2	-2.5	10	0.177	down
CAB39L	-2.49	13	0.178	down
C1orf116	-2.49	17	0.178	down
ADH7	-2.48	11	0.179	down
EPHX3	-2.48	14	0.179	down
ASPA	-2.48	10	0.179	down
SLC6A1	-2.47	12	0.18	down
UBL3	-2.47	17	0.18	down
ST6GALNAC1	-2.47	10	0.18	down
SORBS2	-2.46	16	0.182	down
PTN	-2.46	14	0.182	down
EVPL	-2.46	15	0.182	down
DNASE1L3	-2.44	12	0.184	down
LPIN1	-2.43	16	0.186	down
SLC16A7	-2.42	16	0.187	down
COL14A1	-2.42	10	0.187	down
PLEKHA6	-2.41	11	0.188	down
ADIRF	-2.41	13	0.188	down
TMPRSS11D	-2.39	12	0.191	down
BEX4	-2.38	14	0.192	down
CFD	-2.37	14	0.193	down
HSPB8	-2.35	15	0.196	down
NUCB2	-2.35	18	0.196	down
CH25H	-2.35	14	0.196	down
ANKRD35	-2.34	11	0.198	down
C7	-2.34	10	0.198	down
CD207	-2.34	12	0.198	down
ZNF431	-2.33	10	0.199	down
PAQR8	-2.32	14	0.2	down
TP53I3	-2.31	16	0.202	down
CD24	-2.3	15	0.203	down
CCNG2	-2.29	16	0.204	down
TMEM40	-2.29	16	0.204	down
AGFG2	-2.28	14	0.206	down
EPB41L3	-2.28	15	0.206	down
GCNT3	-2.27	11	0.207	down
CES2	-2.26	12	0.209	down
CAPN5	-2.26	16	0.209	down
PIK3C2G	-2.26	11	0.209	down
TP53INP2	-2.24	11	0.212	down
RCAN2	-2.24	11	0.212	down
GALNT12	-2.24	16	0.212	down
EPS8L2	-2.22	14	0.215	down
CAMK2N1	-2.22	15	0.215	down
DLG2	-2.22	12	0.215	down
MPZL3	-2.22	12	0.215	down
HS3ST1	-2.21	11	0.216	down
PAX9	-2.21	12	0.216	down
PDZD2	-2.2	15	0.218	down
PDLIM2	-2.2	14	0.218	down
ALOX15B	-2.19	11	0.219	down
USP6NL	-2.18	15	0.221	down
PLAC8	-2.17	14	0.222	down
RAB11FIP1	-2.17	12	0.222	down
RRAD	-2.16	11	0.224	down
GPT2	-2.16	12	0.224	down
C18orf25	-2.16	15	0.224	down
MAPT	-2.15	10	0.225	down
DHRS1	-2.14	14	0.227	down
ATP10B	-2.14	11	0.227	down
LYPD3	-2.14	12	0.227	down
ID4	-2.14	12	0.227	down
LRRK2	-2.14	10	0.227	down
GLTP	-2.14	12	0.227	down
SLC24A3	-2.14	15	0.227	down
CYP2C9	-2.14	12	0.227	down
ARG1	-2.13	10	0.228	down
XG	-2.13	10	0.228	down
GMDS	-2.13	14	0.228	down
MAMDC2	-2.13	11	0.228	down
GPD1L	-2.12	17	0.23	down
MUC1	-2.12	13	0.23	down
RRAGD	-2.1	17	0.233	down
DUOX1	-2.1	14	0.233	down
EYA2	-2.1	12	0.233	down
RNF39	-2.08	11	0.237	down
SLPI	-2.08	14	0.237	down
VASN	-2.08	11	0.237	down
HLF	-2.08	15	0.237	down
GRHL1	-2.07	12	0.238	down
CITED2	-2.06	17	0.24	down
ST3GAL4	-2.06	11	0.24	down
QSOX1	-2.06	11	0.24	down
B3GNT3	-2.05	10	0.241	down
CYP4F12	-2.05	14	0.241	down
FAM214A	-2.05	13	0.241	down
EXPH5	-2.05	16	0.241	down
POF1B	-2.05	12	0.241	down
OR7E14P	-2.04	10	0.243	down
CNN3	-2.04	10	0.243	down
EPHX2	-2.03	16	0.245	down
ALS2CL	-2.02	12	0.247	down
RAB27B	-2.01	12	0.248	down
KIAA1211L	-2.01	13	0.248	down
NDRG2	-2.01	14	0.248	down
CPEB3	-2	14	0.25	down
SORT1	-2	15	0.25	down
SLC44A3	-1.99	10	0.252	down
TGFBR3	-1.99	12	0.252	down
PIM1	-1.99	16	0.252	down
LCN2	-1.99	14	0.252	down
GRHL3	-1.99	12	0.252	down
EHF	-1.99	15	0.252	down
SMAGP	-1.99	17	0.252	down
TMOD3	-1.98	14	0.253	down
CST6	-1.97	12	0.255	down
DUSP1	-1.97	10	0.255	down
PDZK1IP1	-1.96	10	0.257	down
CCDC69	-1.96	10	0.257	down
P2RY14	-1.96	12	0.257	down
RMND5B	-1.96	16	0.257	down
ABLIM1	-1.96	18	0.257	down
TRIP10	-1.95	17	0.259	down
RBP7	-1.95	11	0.259	down
CRYAB	-1.95	14	0.259	down
ROR1	-1.95	14	0.259	down
RASAL1	-1.95	14	0.259	down
C4orf3	-1.94	11	0.261	down
LY6D	-1.93	13	0.262	down
SERPINB6	-1.93	12	0.262	down
ZBTB7C	-1.92	10	0.264	down
ZNF426	-1.92	14	0.264	down
RANBP9	-1.92	16	0.264	down
STRADB	-1.92	12	0.264	down
NMU	-1.92	16	0.264	down
FCHO2	-1.92	12	0.264	down
ABAT	-1.92	12	0.264	down
STX19	-1.91	10	0.266	down
EPHA2	-1.9	13	0.268	down
SLC39A2	-1.9	11	0.268	down
SLC35C1	-1.89	12	0.27	down
PHACTR2	-1.89	15	0.27	down
ABHD5	-1.89	15	0.27	down
ALDH3B2	-1.88	10	0.272	down
COBL	-1.88	15	0.272	down
KANK1	-1.87	19	0.274	down
NLRX1	-1.87	12	0.274	down
WFDC1	-1.87	10	0.274	down
ZDHHC13	-1.87	14	0.274	down
LGALS3	-1.87	10	0.274	down
FAM189A2	-1.87	12	0.274	down
ELOVL4	-1.86	13	0.275	down
BSPRY	-1.86	12	0.275	down
CPEB4	-1.86	11	0.275	down
PTGS1	-1.85	11	0.277	down
RNF141	-1.85	15	0.277	down
MAPK3	-1.85	10	0.277	down
ALDH9A1	-1.84	15	0.279	down
TTC39A	-1.84	14	0.279	down
GALE	-1.84	11	0.279	down
PLIN3	-1.84	11	0.279	down
PHYHD1	-1.84	10	0.279	down
TTC22	-1.84	12	0.279	down
PKIB	-1.84	10	0.279	down
PGD	-1.83	11	0.281	down
GPR157	-1.83	10	0.281	down
ACOX3	-1.83	13	0.281	down
MPP7	-1.83	12	0.281	down
PAQR5	-1.82	11	0.283	down
ADAMTSL4	-1.82	10	0.283	down
SVIP	-1.82	10	0.283	down
RND3	-1.81	13	0.285	down
ECHDC2	-1.79	15	0.289	down
ACADM	-1.79	15	0.289	down
GULP1	-1.79	12	0.289	down
ARHGAP10	-1.78	14	0.291	down
STK39	-1.78	15	0.291	down
MOSPD1	-1.78	11	0.291	down
PMM1	-1.78	17	0.291	down
USP46	-1.77	11	0.293	down
CAST	-1.77	16	0.293	down
PHLDA1	-1.77	12	0.293	down
PLEKHM1	-1.76	12	0.295	down
DAPP1	-1.76	10	0.295	down
AR	-1.76	11	0.295	down
PALMD	-1.76	11	0.295	down
ARHGAP32	-1.75	14	0.297	down
ITM2A	-1.75	13	0.297	down
SNX9	-1.75	10	0.297	down
ULK3	-1.75	10	0.297	down
VAV3	-1.75	13	0.297	down
CPA4	-1.75	11	0.297	down
PPDPF	-1.75	10	0.297	down
SAMD9	-1.74	11	0.299	down
NR3C2	-1.74	10	0.299	down
TMEM79	-1.74	11	0.299	down
ARHGEF10L	-1.74	13	0.299	down
FUT2	-1.74	11	0.299	down
INPP1	-1.73	13	0.301	down
DDAH1	-1.73	16	0.301	down
RAB25	-1.72	14	0.304	down
ZNF750	-1.72	13	0.304	down
RORA	-1.72	15	0.304	down
KLF8	-1.72	12	0.304	down
PAIP2B	-1.71	13	0.306	down
SNX24	-1.71	12	0.306	down
CDKN2AIP	-1.71	13	0.306	down
GRAMD1C	-1.71	10	0.306	down
KLF4	-1.7	13	0.308	down
VPS4B	-1.7	13	0.308	down
TSPAN6	-1.69	12	0.31	down
GCHFR	-1.69	13	0.31	down
ARHGAP27	-1.69	12	0.31	down
FBXL16	-1.69	13	0.31	down
ACOX1	-1.69	12	0.31	down
DEPTOR	-1.68	12	0.312	down
NAGK	-1.68	14	0.312	down
VPS37B	-1.68	14	0.312	down
ELOVL6	-1.68	13	0.312	down
TST	-1.67	12	0.314	down
RBPMS	-1.67	13	0.314	down
ELL2	-1.67	11	0.314	down
XYLT1	-1.67	12	0.314	down
PHACTR4	-1.66	15	0.316	down
ESPL1	-1.66	15	0.316	down
NBEAL2	-1.66	12	0.316	down
ETHE1	-1.66	12	0.316	down
ACAA1	-1.66	13	0.316	down
SPAG16	-1.65	15	0.319	down
MECOM	-1.65	10	0.319	down
MOXD1	-1.65	11	0.319	down
SPATA18	-1.65	10	0.319	down
NPEPPS	-1.65	14	0.319	down
PLBD1	-1.64	11	0.321	down
NEBL	-1.64	16	0.321	down
BLVRB	-1.64	14	0.321	down
SYNGR1	-1.64	13	0.321	down
PLCD1	-1.64	12	0.321	down
PIGN	-1.63	10	0.323	down
VAT1	-1.63	14	0.323	down
HEBP2	-1.63	14	0.323	down
ETFDH	-1.62	14	0.325	down
CD1A	-1.62	10	0.325	down
NMRK1	-1.61	14	0.328	down
RUNDC3B	-1.61	10	0.328	down
MAFF	-1.61	12	0.328	down
TM7SF2	-1.61	15	0.328	down
MANSC1	-1.61	11	0.328	down
MGST2	-1.6	16	0.33	down
SUSD4	-1.6	10	0.33	down
AMOTL2	-1.6	11	0.33	down
ANXA11	-1.6	15	0.33	down
CRYL1	-1.6	15	0.33	down
FAM221A	-1.6	11	0.33	down
NAAA	-1.59	13	0.332	down
ACOX2	-1.59	11	0.332	down
SELENBP1	-1.59	12	0.332	down
MFSD5	-1.59	10	0.332	down
WDR26	-1.59	11	0.332	down
RAB11A	-1.58	14	0.334	down
S100A12	-1.58	10	0.334	down
CLTB	-1.58	12	0.334	down
NT5C2	-1.58	12	0.334	down
METTL7A	-1.57	12	0.337	down
CPPED1	-1.57	13	0.337	down
TOM1	-1.57	11	0.337	down
MAP3K9	-1.57	12	0.337	down
GATM	-1.57	10	0.337	down
SH3GLB2	-1.56	12	0.339	down
RIOK3	-1.56	10	0.339	down
DYNLT3	-1.55	13	0.342	down
DOCK9	-1.54	15	0.344	down
VLDLR	-1.54	11	0.344	down
ELF3	-1.54	13	0.344	down
COBLL1	-1.53	11	0.346	down
LRRFIP2	-1.53	15	0.346	down
LRP10	-1.53	15	0.346	down
MEIS1	-1.52	11	0.349	down
CCDC6	-1.52	12	0.349	down
PLEKHA7	-1.52	12	0.349	down
PLAGL1	-1.51	15	0.351	down
SECISBP2L	-1.51	15	0.351	down
CHP1	-1.51	12	0.351	down
TOM1L2	-1.51	10	0.351	down
PPM1K	-1.51	11	0.351	down
MTMR10	-1.5	12	0.354	down
OGFRL1	-1.5	10	0.354	down
PLEKHG6	-1.5	10	0.354	down
CPNE3	-1.49	11	0.356	down
RBM47	-1.49	15	0.356	down
SH3GL1	-1.49	10	0.356	down
GAS7	-1.49	10	0.356	down
RAPGEFL1	-1.49	11	0.356	down
TYRO3	-1.49	10	0.356	down
MPC1	-1.49	11	0.356	down
OSBPL10	-1.48	12	0.358	down
LMO2	-1.48	11	0.358	down
SLK	-1.47	15	0.361	down
MYO6	-1.47	11	0.361	down
HIGD1A	-1.47	12	0.361	down
EIF4E3	-1.46	10	0.363	down
GAB1	-1.46	11	0.363	down
PRSS8	-1.46	12	0.363	down
FBXO3	-1.46	13	0.363	down
GSN	-1.46	12	0.363	down
AHNAK	-1.45	15	0.366	down
SLC26A2	-1.45	13	0.366	down
ITPR2	-1.45	13	0.366	down
SCNN1A	-1.45	13	0.366	down
ZBED2	-1.45	11	0.366	down
DENND2D	-1.45	12	0.366	down
TRIM13	-1.45	10	0.366	down
KIAA0232	-1.44	15	0.369	down
OCLN	-1.43	12	0.371	down
EPB41L4A	-1.43	11	0.371	down
SUCLG2	-1.43	11	0.371	down
FRMD4B	-1.43	15	0.371	down
CBR3	-1.42	12	0.374	down
OXSR1	-1.42	10	0.374	down
EMC3	-1.41	11	0.376	down
GNE	-1.41	14	0.376	down
STX12	-1.41	10	0.376	down
RMND5A	-1.41	12	0.376	down
PPP2R2A	-1.41	10	0.376	down
HPSE	-1.4	12	0.379	down
PDCD6IP	-1.4	11	0.379	down
PPFIBP2	-1.39	11	0.382	down
TXN	-1.39	10	0.382	down
TPCN1	-1.39	11	0.382	down
MPZL2	-1.39	14	0.382	down
PKP3	-1.38	11	0.384	down
CLDN7	-1.37	13	0.387	down
KLK7	-1.37	10	0.387	down
KLHL2	-1.37	11	0.387	down
ANXA3	-1.35	15	0.392	down
TIAM1	-1.35	16	0.392	down
ANO10	-1.35	10	0.392	down
FBXO34	-1.35	13	0.392	down
PEG3	-1.34	10	0.395	down
LMBRD1	-1.34	10	0.395	down
MYO5B	-1.34	11	0.395	down
TJP1	-1.32	12	0.401	down
GAB2	-1.32	12	0.401	down
SSBP2	-1.32	11	0.401	down
ALDH7A1	-1.31	10	0.403	down
KCTD6	-1.31	13	0.403	down
SPINT1	-1.3	11	0.406	down
ATP8A1	-1.3	10	0.406	down
KRT15	-1.28	15	0.412	down
ALDH3A2	-1.26	11	0.418	down
EPHA1	-1.26	12	0.418	down
EPN3	-1.25	10	0.42	down
PLLP	-1.22	14	0.429	down
WWC1	-1.21	14	0.432	down
CLIP1	-1.2	10	0.435	down
ERBB3	-1.2	14	0.435	down
C1orf210	-1.19	10	0.438	down
CDS1	-1.18	11	0.441	down
C12orf29	-1.18	12	0.441	down
RIPK4	-1.18	11	0.441	down
TECR	-1.17	12	0.444	down
RASAL2	-1.16	10	0.448	down
SH3RF2	-1.15	10	0.451	down
AOC3	-1.15	10	0.451	down
PELI1	-1.15	11	0.451	down
CLDN4	-1.15	11	0.451	down
RNF11	-1.14	10	0.454	down
CRIP2	-1.14	10	0.454	down
ACTG2	-1.08	10	0.473	down
DSC2	-1.08	11	0.473	down
PLS1	-1.07	10	0.476	down
